# Supplementary material
Source: PubMed Central journal article supplement (PMC7784691)

1 **Supplementary Information and Figures**

2  
3 **IL-33 -induced Reactive Oxygen Species is Required for optimal Metabolic**  
4 **Program in Group 2 Innate Lymphoid cells**

5  
6 **Authors and affiliations:**

7 Chaoyue Zheng,<sup>a</sup> Haisi Wu,<sup>a, b</sup> Zhen Lu,<sup>a, b</sup> Jiacheng Bi,<sup>a, b, \*</sup> Xiaochun Wan<sup>a, b, \*</sup>

8 <sup>a</sup> Shenzhen Laboratory of Fully Human Antibody Engineering, Institute  
9 of Biomedicine and Biotechnology, Shenzhen Institutes of Advanced Technology,  
10 Chinese Academy of Sciences, Shenzhen 518055, People's Republic of China

11 <sup>b</sup> University of Chinese Academy of Sciences, Beijing, People's Republic of China

12 \*Correspondence should be addressed to Xiaochun Wan (xc.wan@siat.ac.cn), or to  
13 Jiacheng Bi (jc.bi@siat.ac.cn).

14  
15 **SUPPLEMENTARY METHODS**

16 **Mice**

17 C57BL/6 wild-type mice were purchased from Beijing Vital River Laboratory Animal  
18 Technology (Beijing, China), or from Hunan SJA Laboratory Animal (Hunan, China).  
19 *Nox2*<sup>-/-</sup> mice and *St2*<sup>-/-</sup> mice were purchased from Cyagen Biosciences (Jiangsu,  
20 China). *Rag1*<sup>-/-</sup> mice were obtained from the Model Animal Research Center (Jiangsu,  
21 China). All mice used were 5 to 8 weeks old, and housed in the specific  
22 pathogenfree facility at the Shenzhen Institutes of Advanced Technology,  
23 Chinese Academy of Sciences. All animal experiments were approved by the  
24 Institutional Animal Care and Use Committee.

25  
26  
27 **Mouse models**

28 For the model of IL-33 –driven ILC2 infiltration into the liver, hydrodynamic  
29 injection of 6 µg IL-33 –encoding plasmid was performed to induce IL-33  
30 overexpression in the liver. Mice were i.p. injected with 5 mg NAC / 400 µL PBS, or

31 25 µg Rapamycin / 5 µL DMSO in 400 µL PBS 6 hour later, and for the next 3 days.  
32 Liver lymphocytes were isolated and analyzed 1 day after the final injection.

33

34 To induce airway inflammation, we intranasally administered mice with 1µg mouse  
35 IL-33 recombinant protein (R&D Systems, MN, USA) every day for four days, and  
36 sacrificed these mice one day after the final administration. 5 mg NAC / 400 µL PBS,  
37 or 25 µg Rapamycin / 5 µL DMSO in 400 µL PBS was i.p. injected 6 hour after IL-33  
38 administration every day. 1 mL BALF or the lung tissue was harvested for analysis of  
39 ILC2 numbers, eosinophil numbers, or cytokine levels.

40

41 For the ILC2s adoptive transfer model, 0.5-1 million in vitro expanded mouse ILC2s  
42 were i.p. injected into recipient NDG (which lacks ILC2s) or *St2<sup>-/-</sup>* mice. Two hour  
43 after transfer, 5 mg NAC per mice in 0.2 mL PBS or 0.2 mL PBS only was  
44 subsequently injected intraperitoneally. Another two hour later, 1 µg mouse IL-33  
45 (R&D Systems, MN, USA) in 0.2 mL PBS was injected intraperitoneally. The  
46 injection of NAC/PBS and IL-33 was performed for 4 consecutive days. One day after  
47 the last injection, 1 mL peritoneal lavage fluid was collected for ILC2 or eosinophil  
48 numbers analysis.

49

#### 50 **Human PBMCs Preparation**

51 Isolation of human peripheral blood from healthy volunteers was performed by  
52 gradient centrifugation with GE Healthcare Ficoll-Paque™ PLUS Media (Thermo  
53 Fisher Scientific, MA, USA). The Ethic Committee of Shenzhen Institute of  
54 Advanced Technology approved the experiments.

55

#### 56 **Cytokine Levels Assessment**

57 Cytokine levels were determined by following kits from BD Biosciences (CA, USA):  
58 Mouse/Rat Soluble Protein Master Buffer Kit, Human Soluble Protein Master Buffer  
59 Kit, mouse IL-5 Flex Set, mouse IL-13 Flex Set, human IL-5 Flex Set, and human  
60 IL-13 Flex Set.

61 **In vitro ILC2s culture and treatment**

62 To obtain mouse ILC2s, murine hepatic lymphocytes from the livers harvested from  
63 mice hydrodynamically injected with pcDNA3.1-mcIL-33 plasmid were collected for  
64 staining of ILC2 markers and sorting. Freshly sorted mouse ILC2s were expanded in  
65 RPMI 1640 complete medium with mouse IL-2, IL-7 (Peprotech, NJ, USA), and  
66 IL-33 (R&D Systems, MN, USA). Freshly sorted human ILC2s from peripheral blood  
67 were expanded in RPMI 1640 complete medium with human IL-2 (Peprotech, NJ,  
68 USA) and IL-33 (R&D Systems, MN, USA). RPMI 1640 complete medium contained  
69 10% fetal bovine serum and 1% Penicillin-Streptomycin solution. Cells were rested  
70 for 5-7 days without IL-33 stimulation before re-seeded at 2000 cells/well at round  
71 -bottom plate for experiments. In some experiments, final concentration of 5mmol/L  
72 NAC (Sigma-Aldrich, MO, USA) was added 2 hour before stimulation with a final  
73 concentration of 20ng/ml IL-2, 20ng/ml IL-7, and 5ng/mL IL-33.

74

75 **Flow cytometry and Sorting**

76 The following fluorescent antibodies were used for flow cytometry: FITC anti-human  
77 CD127 (A019D5), FITC anti-mouse/human KLRG1 (2F1/KLRG1), FITC anti-mouse  
78 Ly-6G/Ly-6C (Gr-1) antibody (RB6-8C5), PE anti-mouse Ki67 (16A8), PE  
79 anti-mouse Lineage Cocktail (145-2C11, RB6-8C5, M1/70, RA3-6B2, Ter-119), PE  
80 anti-mouse/human CD11b (M1/70), PE anti-mouse CD98 (RL388), PE anti-mouse  
81 CD71 (RI7217), PerCP/Cy5.5 anti-mouse CD90.2 (30-H12), PerCP/Cyanine5.5  
82 anti-human CD294 (BM16), PerCP/Cy5.5 anti-mouse CD11c (N418), APC  
83 anti-mouse IL-33R $\alpha$  (DIH9), APC anti-human CD45 (HI30), APC anti-human  
84 Lineage Cocktail (CD3, CD14, CD16, CD19, CD20, CD56) (UCHT1, HCD14, 3G8,  
85 HIB19, 2H7, HCD56), eFluor 660 anti-mouse CD170 (eBioscience, 1RNM44N),  
86 Brilliant Violet 510 anti-mouse CD45 (30-F11), PE anti-mouse AKT (pT308) (BD  
87 Biosciences, J1-223.371), PE anti-mouse S6 (pS235/pS236) (BD Biosciences,  
88 N7-548), Alexa Fluor 647 anti-mouse AKT (pS473) (BD Biosciences, M89-61),  
89 Alexa Fluor 647 anti-mouse mTOR (pS2448) (BD Biosciences, O21-404). All  
90 antibodies were purchased from Biolegend, unless specified otherwise.

91

92 For surface staining, a LIVE/DEAD Fixable Violet Dead Cell Stain Kit (Life  
93 Technologies, MA, USA) was used for staining dead cells, before subsequent Fc  
94 blocking, and antibody staining. For intracellular staining, a True-Nuclear  
95 Transcription Factor Buffer Set (Biolegend, CA, USA) was used to fix and  
96 permeabilize cells according to the manufacturer's instructions. CountBright Absolute  
97 Counting Beads (Thermo Fisher Scientific, MA, USA) was used for cell counting.  
98 Mouse ILC2s were identified as live CD45<sup>+</sup>Lineage<sup>-</sup>ST2<sup>+</sup>CD90<sup>+</sup>KLRG1<sup>+</sup> cells (Fig  
99 S1, A). Mouse eosinophils were identified as live CD45<sup>+</sup>Gr-1<sup>+</sup>CD11b<sup>+</sup>CD11c<sup>-</sup>CD170<sup>+</sup>  
100 cells (Fig S1, B). Human ILC2s isolated from peripheral blood were identified as live  
101 CD45<sup>+</sup>Lineage<sup>-</sup>CRTH2<sup>+</sup>CD127<sup>+</sup> cells.

102

103 Cell sorting was performed on a FACS Aria III cell sorter (BD Biosciences, NJ, USA).  
104 Flow cytometry data acquisition was performed on a CytoFLEX (Beckman Coulter,  
105 CA, USA).

106

107 Apoptosis levels were determined by co-staining of Annexin V (Biolegend, CA, USA)  
108 and 7-AAD Viability Staining Solution (eBioscience, CA, USA).

109

110 Levels of total ROS were determined using a DCFH-DA probe according to the  
111 manufacturer's instructions (Beyotime, Jiangsu, China), and by detection of  
112 fluorescent signals on channel 1 by flow cytometry.

113

#### 114 **Transcriptome Analysis**

115 TRIzol Reagent (Invitrogen, CA, USA) was used to isolate total RNA from ILC2s.  
116 Next generation sequencing library was prepared using Ultra RNA Library Prep Kit for  
117 Illumina (CA, USA) according to the manufacturer's protocol (New England  
118 Biolabs, MA, USA). Sequencing was performed on an Illumina HiSeq instrument  
119 following the manufacturer's instructions with a 2 × 150bp paired-end configuration,  
120 and the data was analyzed by GENEWIZ (Jiangsu, China). Genes enrichment analysis

121 based on KEGG pathways was performed on DAVID 6.8 ( <https://david.ncifcrf.gov/> ).

122

### 123 **Electron Microscopy**

124 ILC2s were suspended in fix solution (Servicebio, Hubei, China) on ice for 2-4 hour.

125 After fixation, cell pellet was embeded with 1% agarose, and washed three times in

126 PBS. The cells were subsequently fixed with 1% OsO<sub>4</sub> in 0.1 M PBS (pH 7.4) for

127 2hour at room temperature. OsO<sub>4</sub> was then removed, and cell pellet was rinsed in 0.1

128 M PBS (pH 7.4) for three times. Cells were dehydrated in a gradient ethanol series

129 before infiltrated with acetone (SCRC, Shanghai, China) and EMBED 812 (SPI, PA,

130 USA). After infiltration, samples were embededby baking in a oven at 60 degree for

131 48 hour before cut into ultrathin sections (60-80 nm) with ultramicrotome Leica UC7

132 (Leica, Hessen , Germany). Ultrathin sections were contrasted with uranyl acetate and

133 lead citrate, and examined with a HITACHI HT7700 Transmission Electron

134 Microscopy (Tokyo, Japan). The ImageJ software (National Institutes of Health, MD,

135 USA) was used to show mitochondria for counting, and to calculate the area of the

136 cell.

137

### 138 **Statistical Analysis**

139 Data analyses were performedby the GraphPad Prism 6.0 software (GraphPad

140 Software, CA, USA). Statistically significant differences were determined by the

141 Student *t* test or One-way ANOVA, where appropriate. P values < 0.05 were

142 considered statistical significance.

143

### 144 **SUPPLEMENTARY DISCUSSION**

145 Uncontrolled airway inflammation predisposes the airway to chronic inflammation

146 and subsequent tissue remodeling, resulting in severe asthmatic conditions. ROS has

147 long been proposed to promote airway inflammation, but the underlying mechanisms

148 are not fully understood. In this study, we revealed the role of ROS in the early phase

149 of airway inflammation, when innate immune cells, such as ILC2s, play important

150 roles. We found that ROS levels in ILC2s increased upon cellular activation. The

151 increased ROS is required for optimal mTOR –dependent metabolic program and  
152 functions of ILC2s.

153

154 Protein tyrosine phosphatases are important negative regulators of cellular signaling  
155 by inhibiting the function of protein tyrosine kinases. Since protein tyrosine  
156 phosphatases possess cysteine residues, they are highly reactive to ROS, and therefore  
157 could be the link between ROS and the AKT-mTOR signaling in this study. However,  
158 the exact molecular target of ROS in ILC2 responsible for triggering downstream  
159 AKT-mTOR signaling remains to be determined in future.

160

161 On the other hand, the fact that clinical trials using antioxidant therapy in asthma have  
162 been largely ineffective so far<sup>1-4</sup> suggests that the precise use of antioxidant agents at  
163 the appropriate situation might be the key to the therapeutic effects of antioxidant  
164 therapy. In line with this, our study indicates that NAC antioxidant therapy effectively  
165 alleviates IL-33 –triggered ILC2 –mediated immune responses and airway  
166 inflammations, suggesting that antioxidant therapy might display anti-inflammatory  
167 effects in the early phase of airway inflammations, at least by suppressing ILC2  
168 activation. Besides in mouse models, we also observed significant suppressive effects  
169 of NAC on human ILC2 functions in vitro. Future studies using humanized mouse  
170 models are needed to confirm the therapeutic potential of antioxidant therapy (using  
171 NAC or other reducing agents) on human ILC2 –mediated immune responses and  
172 airway inflammations in vivo.

173

#### 174 **SUPPLEMENTARY REFERENCE**

175 1. Fogarty A, Lewis SA, Scrivener SL, Antoniak M, Pacey S, Pringle M, et al. Oral  
176 magnesium and vitamin C supplements in asthma: a parallel group randomized  
177 placebo-controlled trial. *Clinical and experimental allergy : journal of the British*  
178 *Society for Allergy and Clinical Immunology*. 2003 Oct;33(10):1355-9.

179 2. Allam MF, Lucane RA. Selenium supplementation for asthma. *The Cochrane*  
180 *database of systematic reviews*. 2004 (2):CD003538.

181 3. Fogarty A, Lewis SA, Scrivener SL, Antoniak M, Pacey S, Pringle M, et al.  
182 Corticosteroid sparing effects of vitamin C and magnesium in asthma: a randomised  
183 trial. *Respiratory medicine*. 2006 Jan;100(1):174-9.

184 4. Shaheen SO, Newson RB, Rayman MP, Wong AP, Tumilty MK, Phillips JM, et al.  
185 Randomised, double blind, placebo-controlled trial of selenium supplementation in  
186 adult asthma. *Thorax*. 2007 Jun;62(6):483-90.

187

188

### 189 SUPPLEMENTARY FIGURE LEGENDS

190 **Figure S1.** Gating strategies for ILC2s and eosinophils. (A) ILC2s were gated as live  
191 CD45<sup>+</sup>Lineage<sup>-</sup>ST2<sup>+</sup>CD90<sup>+</sup>KLRG1<sup>+</sup> single cells, and (B) eosinophils were gated as  
192 live CD45<sup>+</sup>Gr-1<sup>+</sup>CD11b<sup>+</sup>CD11c<sup>-</sup>CD170<sup>+</sup> single cells, from total liver lymphocytes as  
193 examples.

194

195 **Figure S2.** NOX2 is required for IL-33 –driven airway ILC2 responses and  
196 inflammation. (A) ROS levels in BALF ILC2s from IL-33 –challenged wild-type or  
197 *Nox2*<sup>-/-</sup> mice. (B) Lung ILC2s from untreated Wild-type or *Nox2*<sup>-/-</sup> mice were analyzed.  
198 (left) Representative graphs of Lin<sup>-</sup>ST2<sup>+</sup> cells among live CD45<sup>+</sup> lymphocytes in the  
199 lung tissue. (right) Absolute numbers of ILC2s per gram lung tissue. (C-E) Wild-type  
200 or *Nox2*<sup>-/-</sup> mice were intranasally administered with IL-33 for 4 days to induce airway  
201 inflammation for BALF analysis. (C) (left) Representative graphs of Lin<sup>-</sup>ST2<sup>+</sup> cells  
202 among live CD45<sup>+</sup> lymphocytes in the BALF. (right) Absolute numbers of ILC2s in  
203 the BALF. (D) IL-5 and IL-13 levels in the BALF. (E) (left) Representative graphs of  
204 SSC<sup>hi</sup>Siglec-F<sup>+</sup> cells among live CD45<sup>+</sup> lymphocytes in the BALF. (right) Absolute  
205 numbers of eosinophils in the BALF. (A-E) Data are representative of at least two  
206 independent experiments, and are presented as the mean ± SEM (n = 6, unless  
207 specified otherwise). \*p<0.05, \*\*p<0.005, \*\*\*p<0.001.

208

209 **Figure S3.** NAC suppressed cytokine production and proliferation of ILC2 in vitro.  
210 (A&B) Mouse ILC2s were pretreated with NAC or equal volume of PBS for 2 hour,

211 before stimulation with IL-33 for 2 days. Percentages of IL-5, IL-13 (A) or Ki67 (B)  
212 –producing ILC2s were shown. (A&B) Data are representative of at least two  
213 independent experiments, and are presented as the mean  $\pm$  SEM (n = 3). \*p<0.05,  
214 \*\*\*p<0.001.

215

216 **Figure S4.** Mitochondria in ILC2s. (A&B) Mouse ILC2s were pretreated with NAC  
217 or equal volume of PBS for 2 hour, before stimulation with IL-33 for 2 days. (A)  
218 Representative electron microscopy photos of ILC2s. Mitochondria were indicated by  
219 arrows. Bars represent 10  $\mu$ m. (B) Mitochondria numbers per cell were shown (left).  
220 Cellular sizes were shown as the area the cell occupied in the photo (right). Data are  
221 based on over 10 randomly taken photos. Data are presented as the mean  $\pm$  SEM.  
222 \*p<0.05.

223

224 **Figure S5.** NAC alleviated IL-33 –driven airway ILC2 responses and inflammation in  
225 *RagI*<sup>-/-</sup> mice. (A-C)*RagI*<sup>-/-</sup> mice were intranasally administered with IL-33 for 4 days  
226 to induce airway inflammation. NAC/PBS was i.p. injected every day. (A)  
227 Representative graphs of Lin<sup>-</sup>ST2<sup>+</sup> cells among live CD45<sup>+</sup> lymphocytes, and absolute  
228 ILC2 numbers in the BALF were shown. (B) IL-5 and IL-13 levels in the BALF were  
229 shown. (C) Representative graphs of SSC<sup>hi</sup>Siglec-F<sup>+</sup> cells among live CD45<sup>+</sup> cells,  
230 and absolute eosinophil numbers in the BALF were shown. (A-C) Data are  
231 representative of at least two independent experiments, and are presented as the mean  
232  $\pm$  SEM (n = 6). \*p<0.05, \*\*\*p<0.001.

233

234 **Figure S6.** Both Rapamycin and NAC alleviated IL-33 –driven ILC2 responses and  
235 eosinophilia in the liver. (A-L) B6 wild-type mice (A-C, F-J) or *RagI*<sup>-/-</sup> mice (D, E, K,  
236 L) were hydrodynamically injected with a IL-33 –encoding plasmid to induce ILC2  
237 infiltration into the liver. Rapamycin/DMSO (A-E) or NAC/PBS (F-L) was i.p.  
238 injected every day. (A, D, H, K) Representative graphs of Lin<sup>-</sup>ST2<sup>+</sup> cells among live  
239 CD45<sup>+</sup> lymphocytes, and absolute ILC2 numbers per gram liver tissue were shown.  
240 (B) Percentages of IL-5 or IL-13 –producing liver ILC2s were shown. (C, E, J, L)



241 Representative graphs of SSC<sup>hi</sup>Siglec-F<sup>+</sup> cells among live CD45<sup>+</sup> cells in the liver,  
242 and absolute eosinophil numbers per gram liver tissue were shown. (F) ROS levels in  
243 liver ILC2s were detected. (G) Mean fluorescent intensity of CD69, CD71, and CD98  
244 expression on liver ILC2s was determined. (A-L) Data are representative of at least  
245 two independent experiments, and are presented as the mean  $\pm$  SEM (n = 6). \*p<0.05,  
246 \*\*p<0.005, \*\*\*p<0.001.  
247

**Figure S1**

**A**

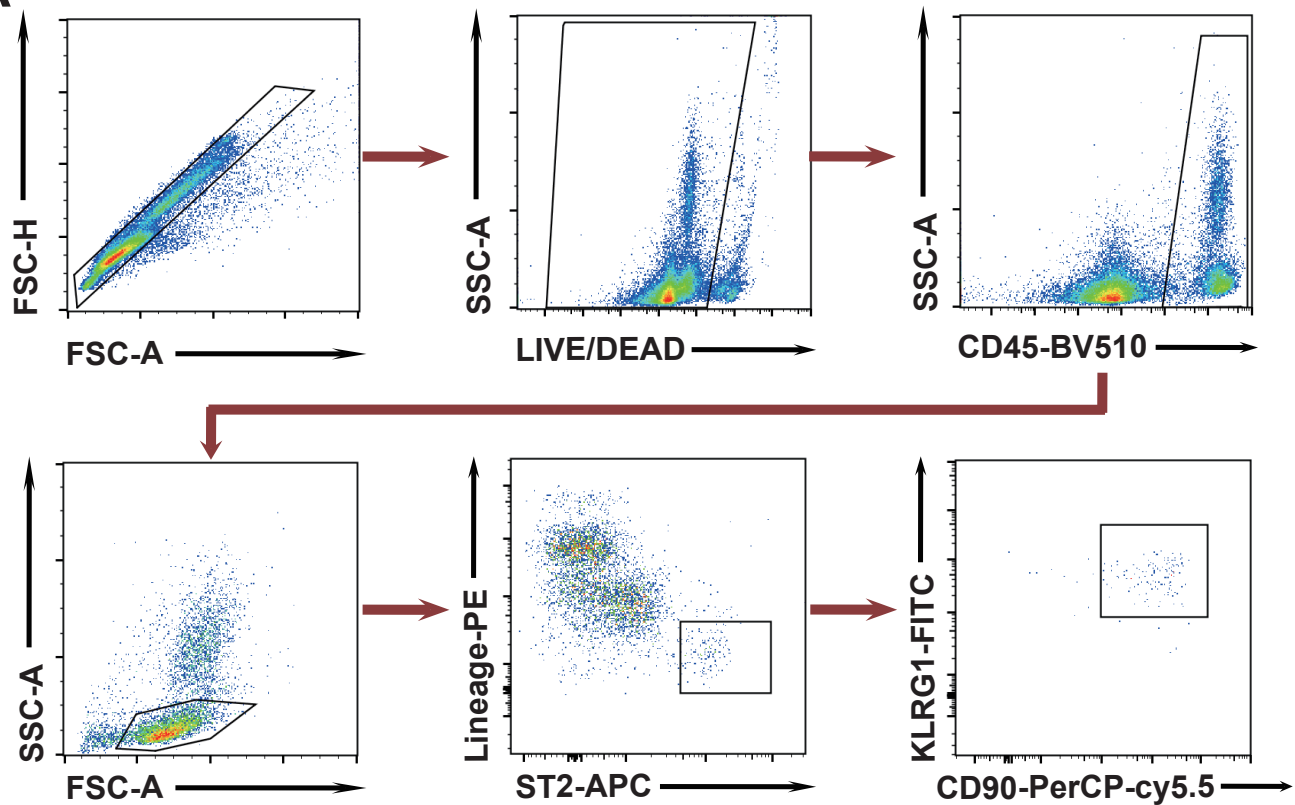

**B**

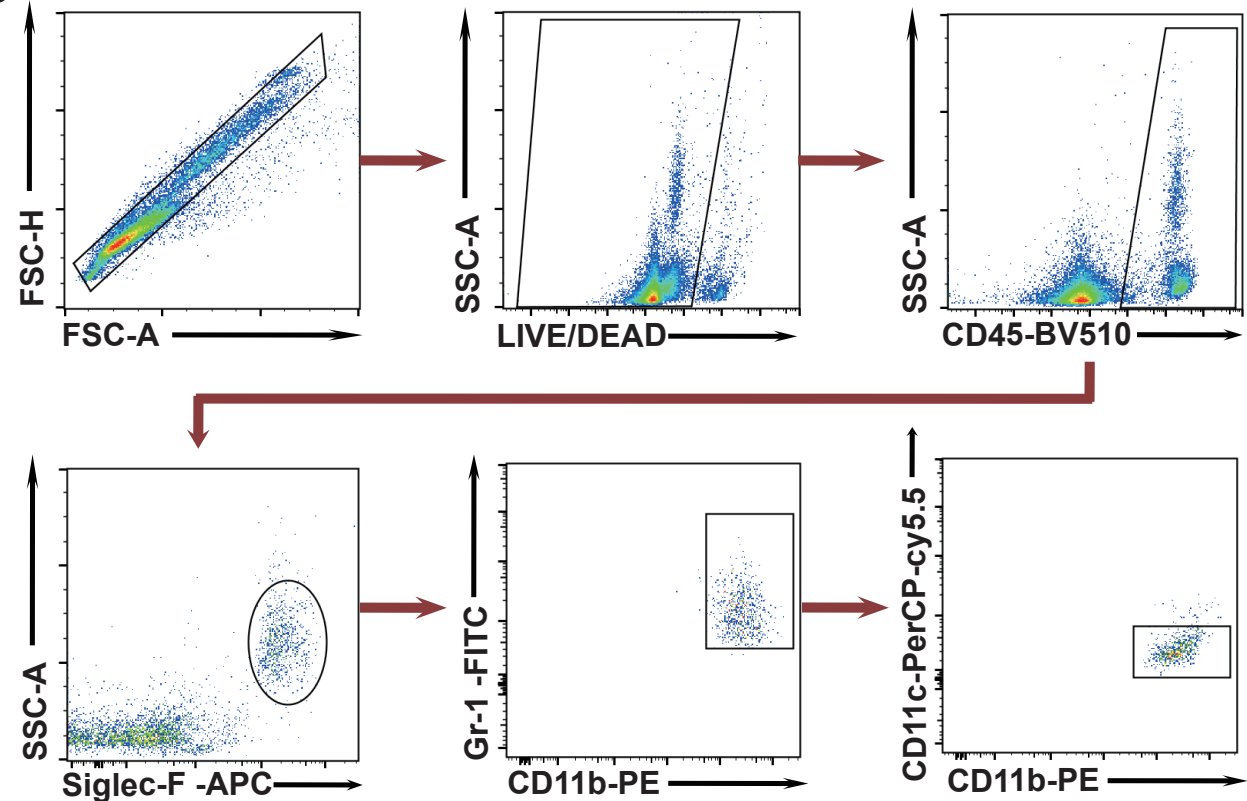

Figure S2

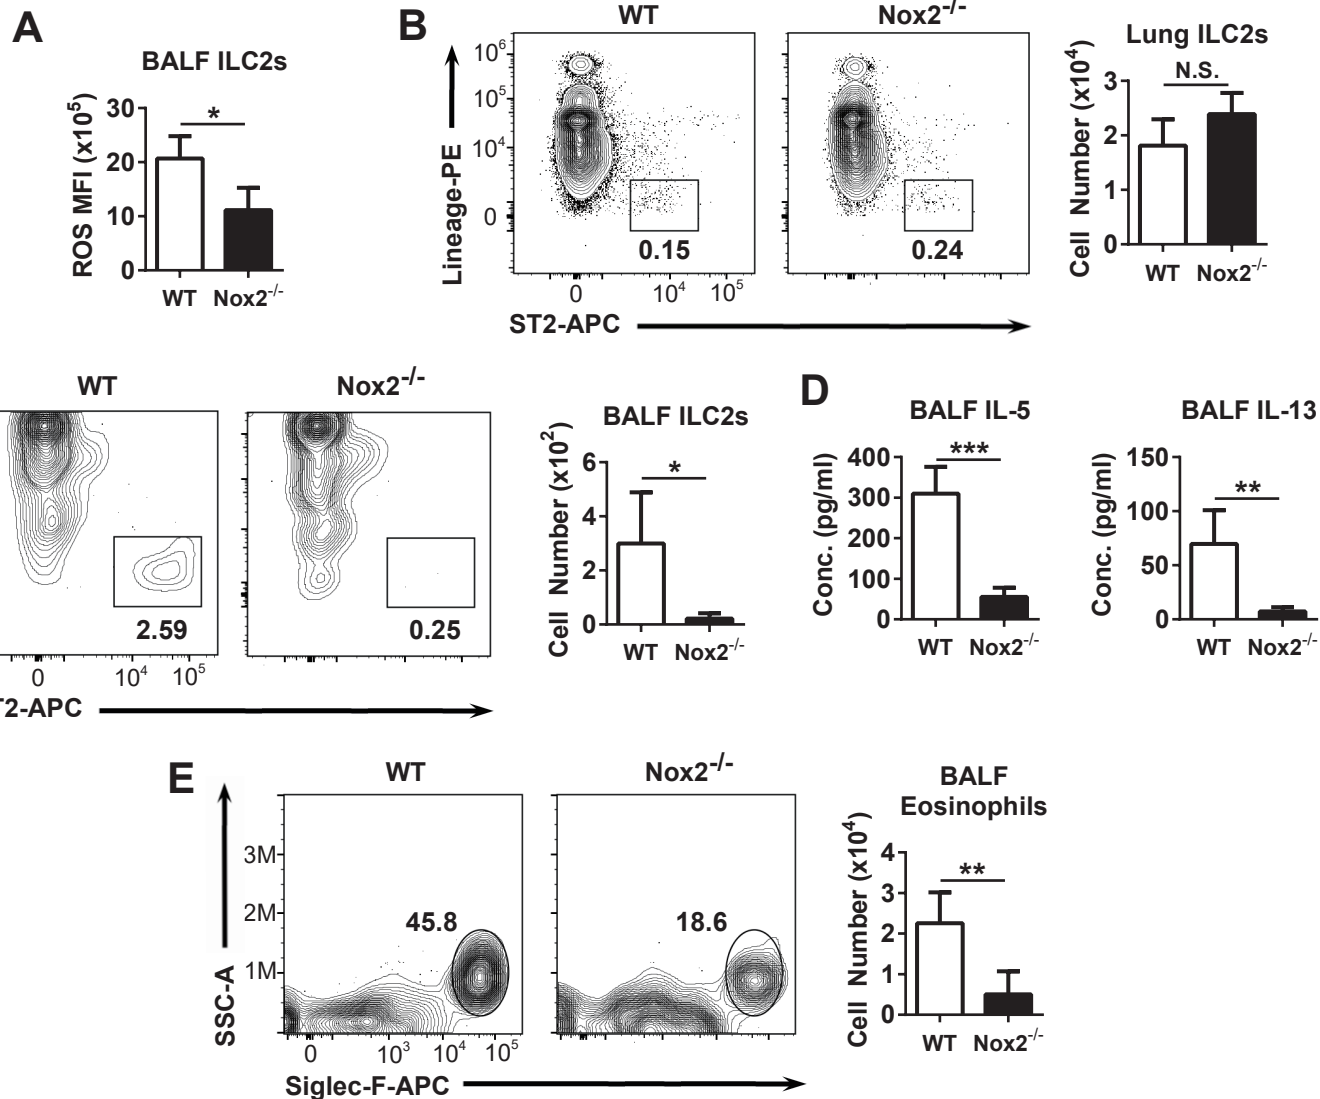

# Figure S3

## A

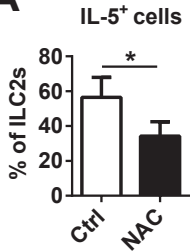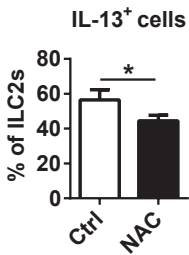

## B

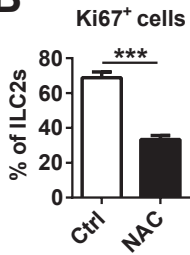

# Figure S4

## A

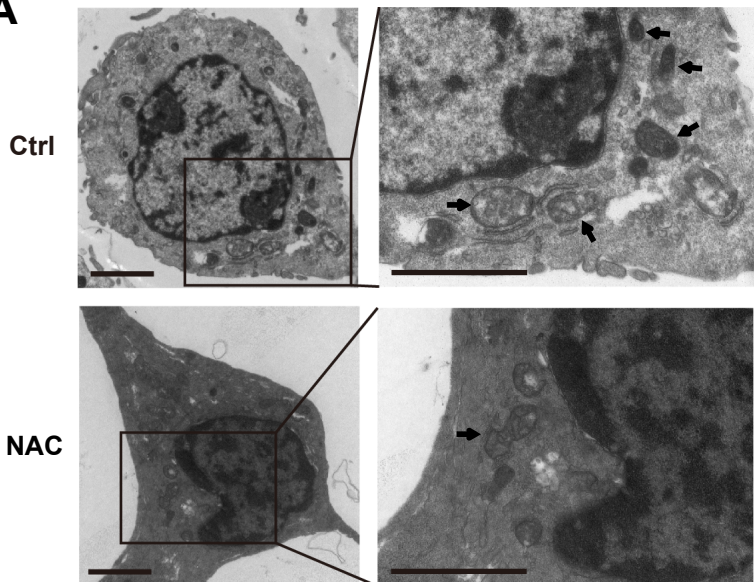

## B

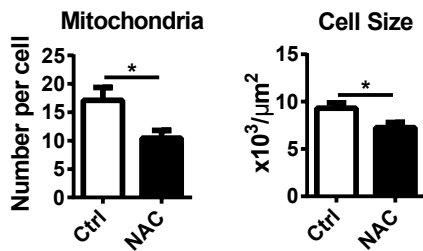

# Figure S5

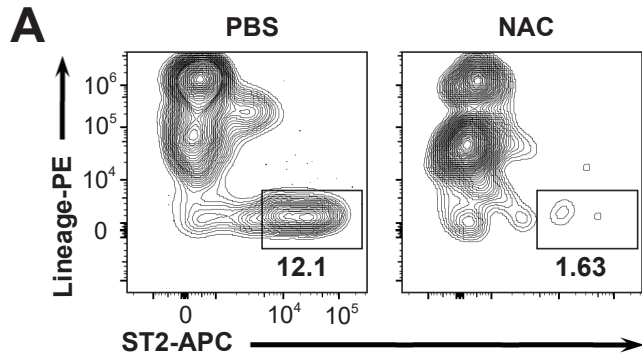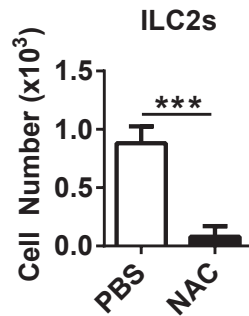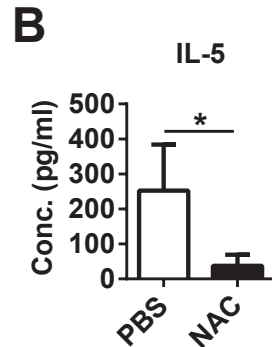

*Rag1*<sup>-/-</sup>

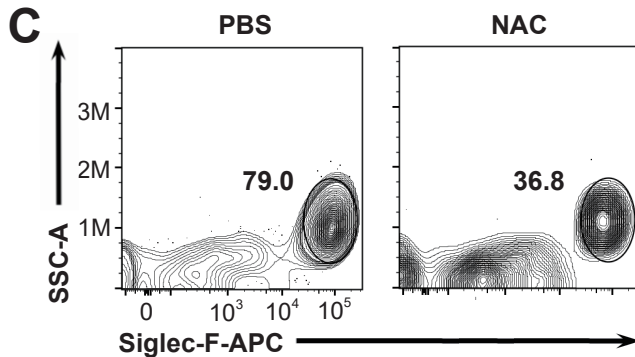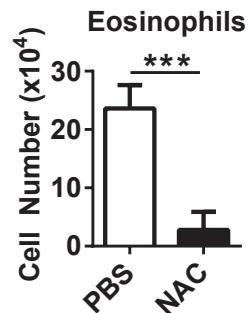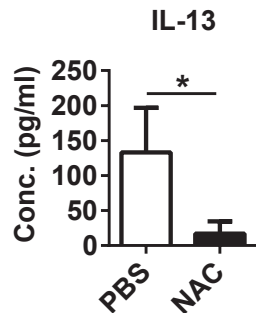

**Figure S6**

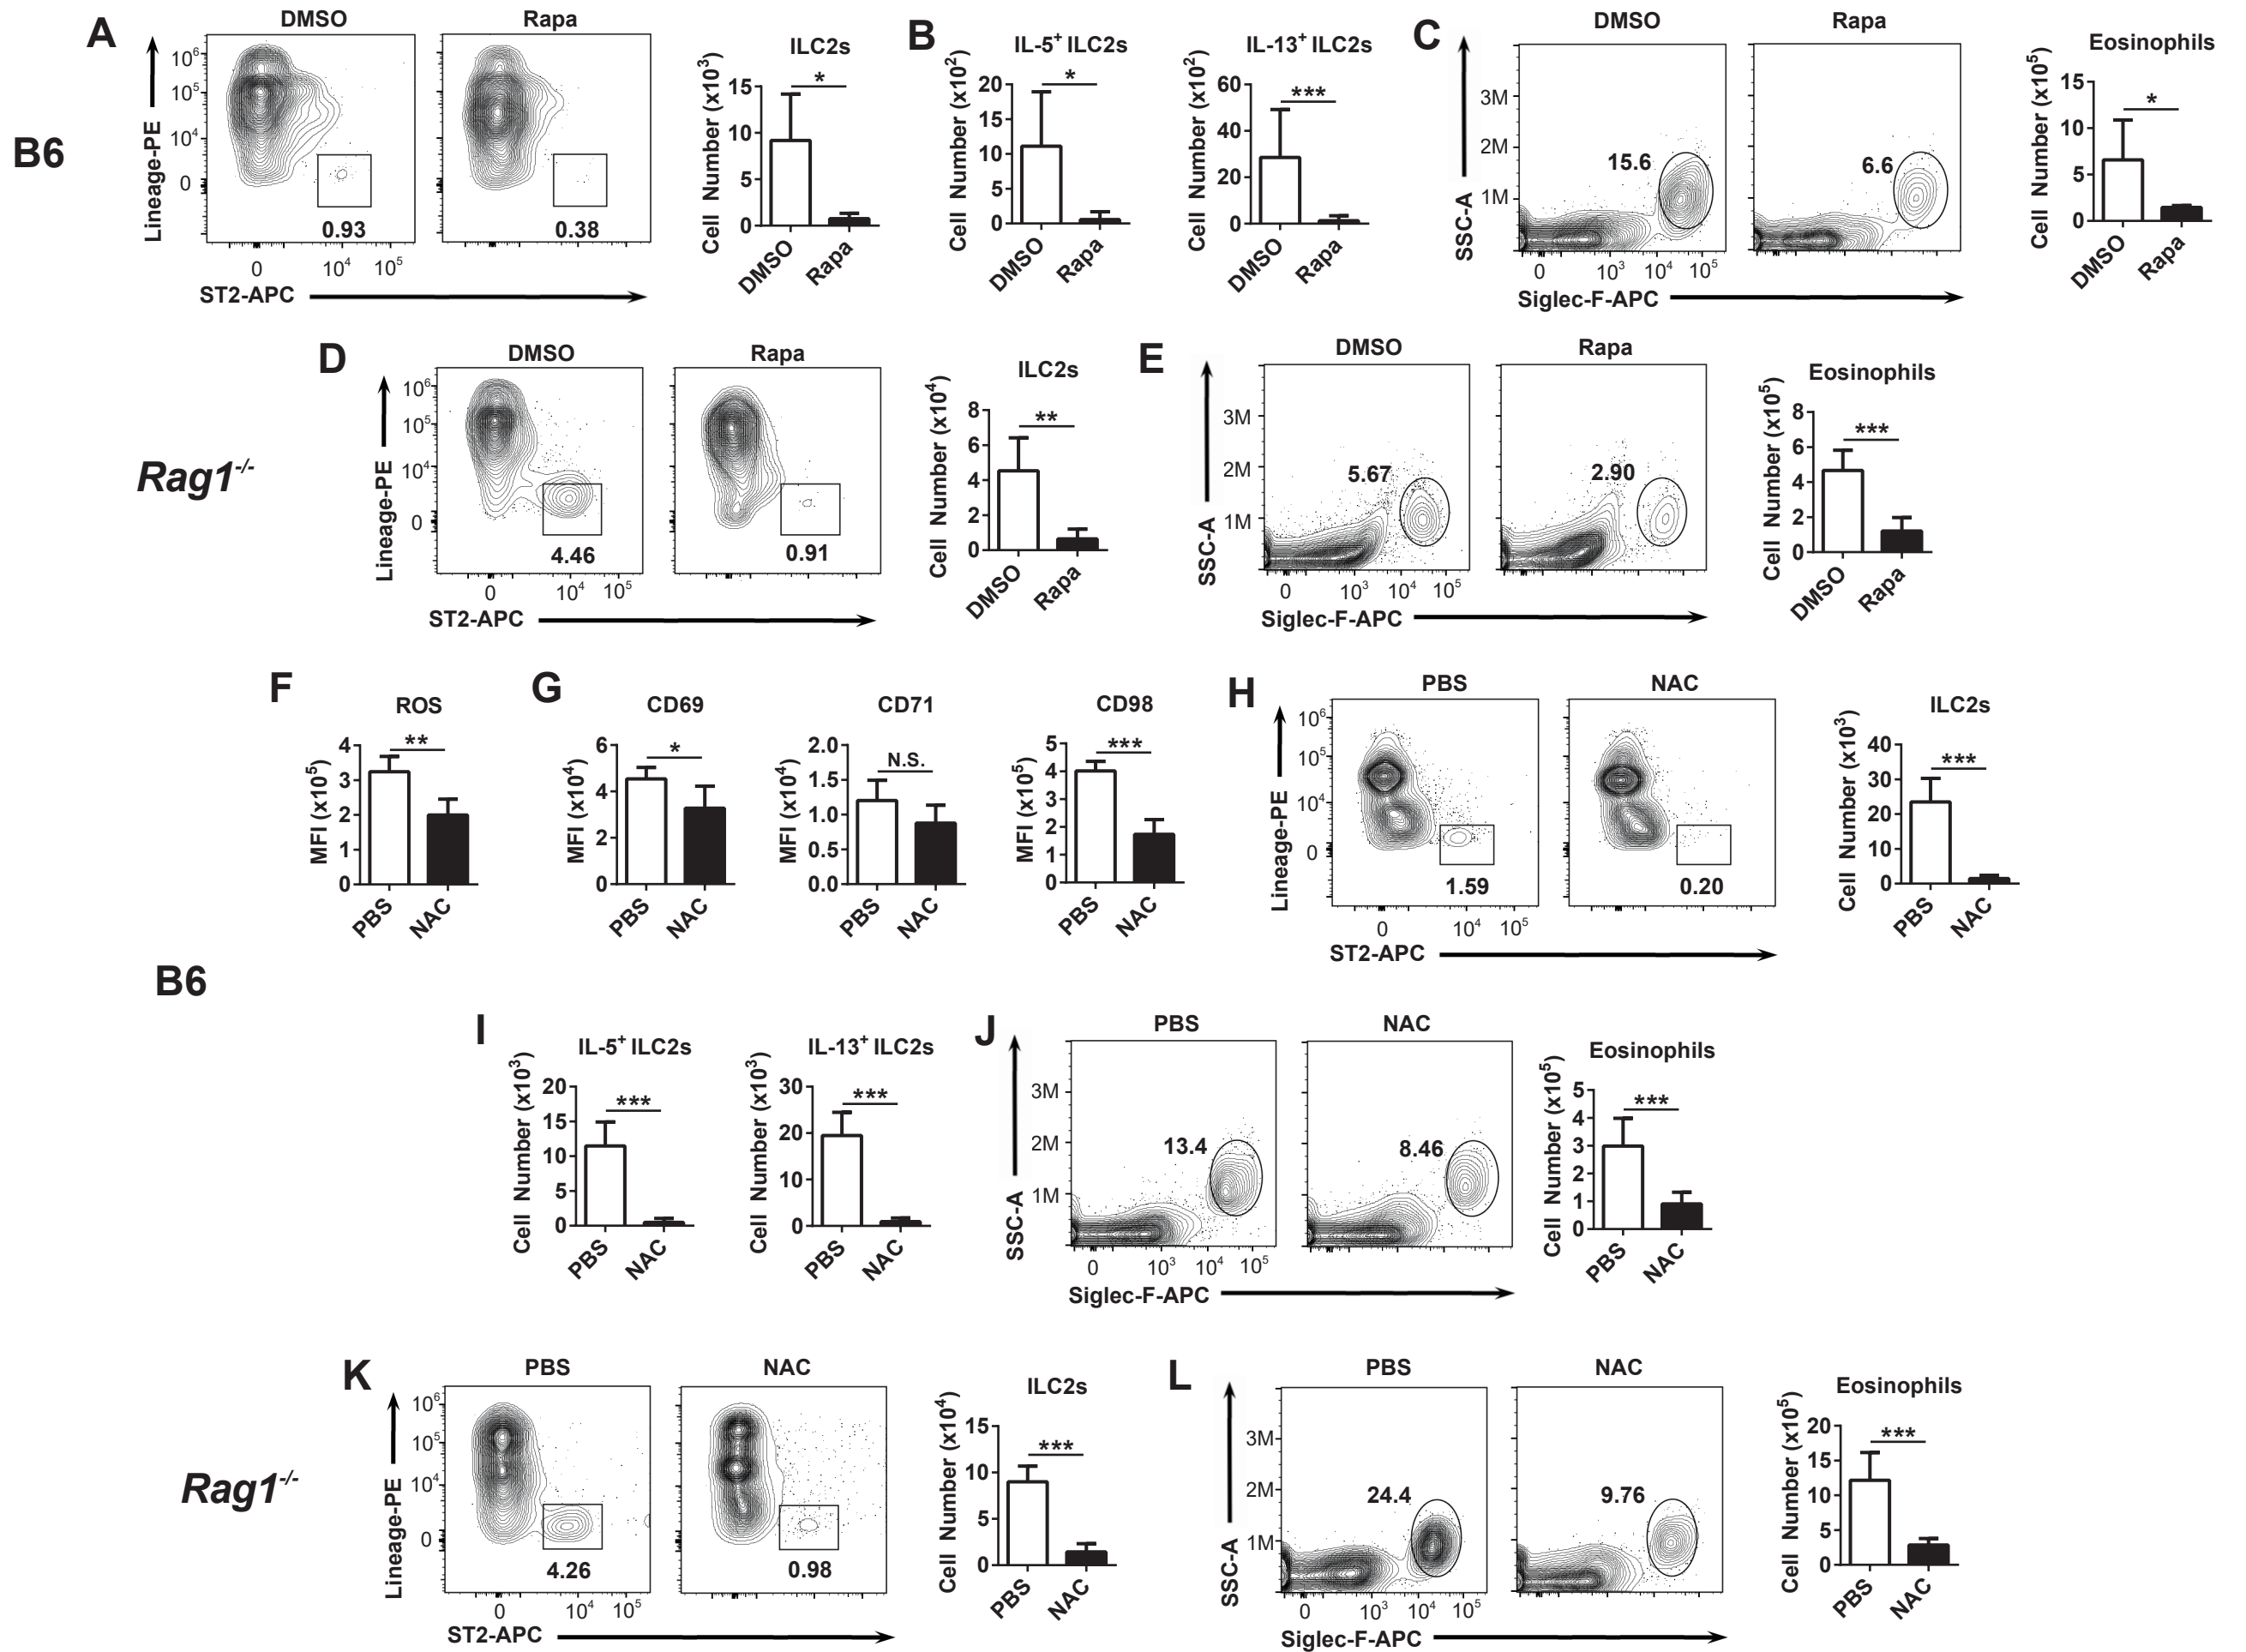

Supplement: 41423_2020_393_MOESM1_ESM.pdf [file 41423_2020_393_MOESM1_ESM.pdf]
